# Supplementary material for: Large interlayer spacing vanadium oxide nanotubes as cathodes for high performance sodium ion batteries
Source: Royal Society of Chemistry journal article supplement (doi:10.1039/c8ra03514h), 2018-01-01
Supplement: c8ra03514h1.pdf [file c8ra03514h1.pdf]

## Supplementary

### Large interlayer spacing vanadium oxide nanotubes as cathodes for high performance sodium ion batteries

Kun Zhang, Guohua Gao\*, Wei Sun, Xing Liang, Yindan Liu, Guangming Wu\*\*

Shanghai key laboratory of Special Artificial Microstructure Materials and Technology, School of

Physics Science and Engineering, Tongji University, Shanghai, 200092, China

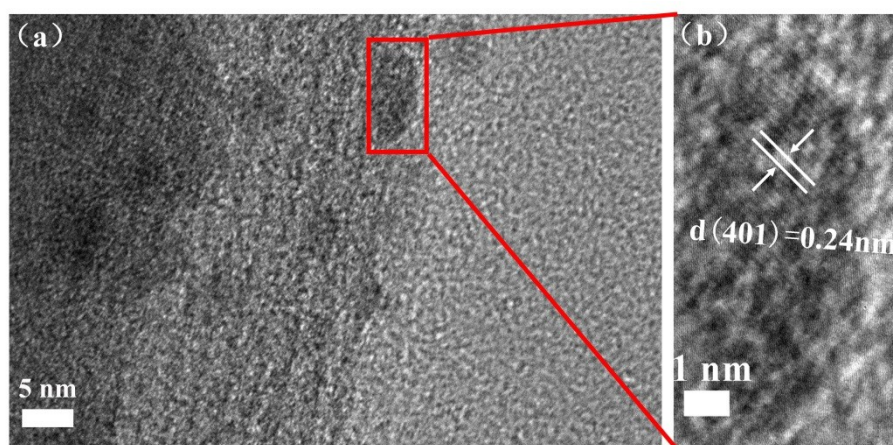

Fig. S1. High magnifications TEM images of VNTs

**Table S1.** The Fe:V ratio of the Fe-VNTs from ICP analysis

| Sample  | Fe (wt%) | V (wt%) | Fe/V (atomic ratio) |
|---------|----------|---------|---------------------|
| Fe-VNTs | 16.98    | 28.39   | 0.053               |

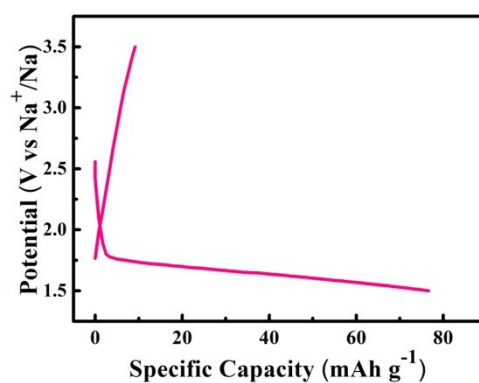

Fig. S2. Galvanostatic charge-discharge profiles of first cycle of V<sub>2</sub>O<sub>5</sub>

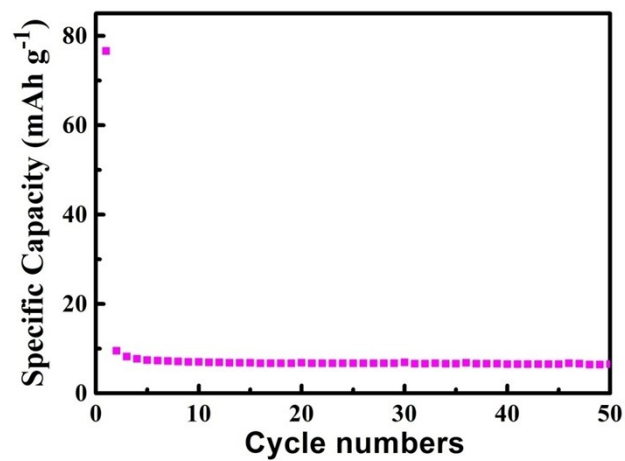

Fig. S3. Cycling performance of V<sub>2</sub>O<sub>5</sub> at 50 mA g<sup>-1</sup>

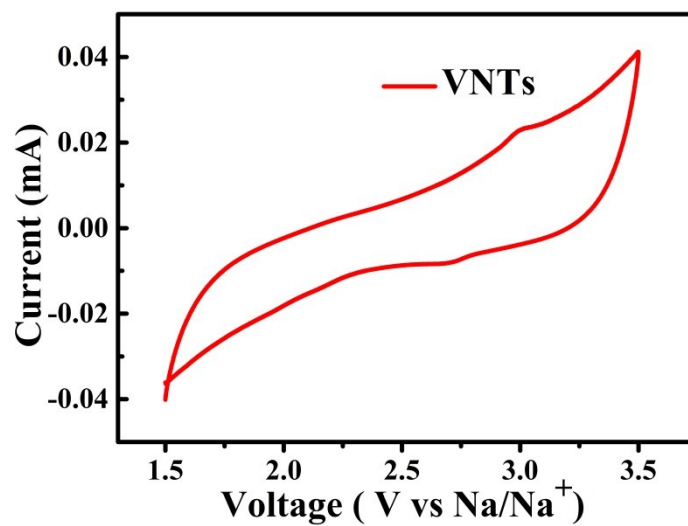

Fig. S4. Cyclic voltammograms of VNTs at scan rate of 0.5 mV s<sup>-1</sup>

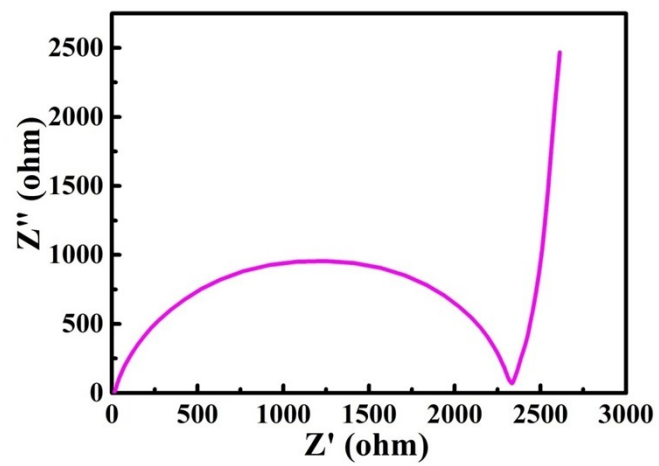

Fig. S5. Nyquist plots of  $V_2O_5$
